# Supplementary material
Source: HighWire-hosted journal article supplement (https://bjgpopen.org/highwire/filestream/3625/field_highwire_adjunct_files/0/BJGPO.2020.0122.pdf)
Supplement: BJGPO.2020.0122.pdf [file BJGPO.2020.0122.pdf]

Table S1. The source cohort<sup>1</sup> in 2015 according to depression diagnosis set in GP consultation, split into subpopulations; (i) no depression diagnosis, (ii) no new depression diagnosis (washed-out population), and (iii) new depression diagnosis (study population), and their distribution across gender, age and education.

|                          | Source cohort <sup>1</sup> |                                           |      |                                      |                                 |        |                              |
|--------------------------|----------------------------|-------------------------------------------|------|--------------------------------------|---------------------------------|--------|------------------------------|
|                          | Total,<br>N = 3,731,117    | No depression diagnosis,<br>N = 3,606,169 |      | Depression diagnosis,<br>N = 124,948 |                                 |        |                              |
|                          |                            |                                           |      |                                      | No new diagnosis,<br>N = 74,981 |        | New diagnosis,<br>N = 49,967 |
|                          | N                          | N                                         | %    | N                                    | %                               | N      | %                            |
| <b>Gender</b>            |                            |                                           |      |                                      |                                 |        |                              |
| Women                    | 1,877,816                  | 1,797,903                                 | 95.7 | 49,138                               | 2.7                             | 30,775 | 1.6                          |
| Men                      | 1,853,301                  | 1,808,266                                 | 97.6 | 25,843                               | 1.4                             | 19,192 | 1.0                          |
| <b>Age group, years</b>  |                            |                                           |      |                                      |                                 |        |                              |
| 20-29                    | 617,580                    | 596,058                                   | 96.5 | 10,547                               | 1.7                             | 10,975 | 1.8                          |
| 30-39                    | 584,190                    | 561,315                                   | 96.1 | 12,178                               | 2.2                             | 10,157 | 1.7                          |
| 40-49                    | 701,302                    | 673,820                                   | 96.1 | 16,531                               | 2.3                             | 10,951 | 1.6                          |
| 50-59                    | 647,347                    | 622,850                                   | 96.2 | 15,576                               | 2.4                             | 8,921  | 1.4                          |
| 60-69                    | 573,037                    | 557,157                                   | 97.2 | 10,744                               | 1.9                             | 5,136  | 0.9                          |
| 70+                      | 607,661                    | 594,969                                   | 97.9 | 8,865                                | 1.5                             | 3,827  | 0.6                          |
| <b>Educational level</b> |                            |                                           |      |                                      |                                 |        |                              |
| Low                      | 848,899                    | 810,379                                   | 95.4 | 23,496                               | 2.8                             | 15,024 | 1.8                          |
| Medium                   | 1,601,445                  | 1,551,560                                 | 96.9 | 29,870                               | 1.9                             | 20,015 | 1.2                          |
| High                     | 1,218,465                  | 1,183,355                                 | 97.1 | 20,730                               | 1.7                             | 14,380 | 1.2                          |
| Missing                  | 62,308                     | 60,875                                    | 97.7 | 885                                  | 1.4                             | 548    | 0.9                          |

<sup>1</sup> Source cohort: all inhabitants of Norway born before 01.01.1996 and alive 01.01.2015

Educational level: Low (primary school (Grades 1-7) and lower secondary school (Grades 8-10) or less), medium (13 years, upper-secondary school) and high (>13 years, university and higher education)
